# Supplementary material for: Enrichment of IGF-1R and PPARγ signalling pathways in orbital inflammatory diseases: steps toward understanding pathogenesis
Source: HighWire-hosted journal article supplement (doi:10.1136/bjophthalmol-2020-318330), 2021-02-26
Supplement: bjophthalmol-2020-318330supp003_data_supplement.pdf [file bjophthalmol-2020-318330supp003_data_supplement.pdf]

A
