# Supplementary figures and images for: Enrichment of IGF-1R and PPARγ signalling pathways in orbital inflammatory diseases: steps toward understanding pathogenesis
Source: HighWire-hosted journal article supplement (doi:10.1136/bjophthalmol-2020-318330), 2021-02-26

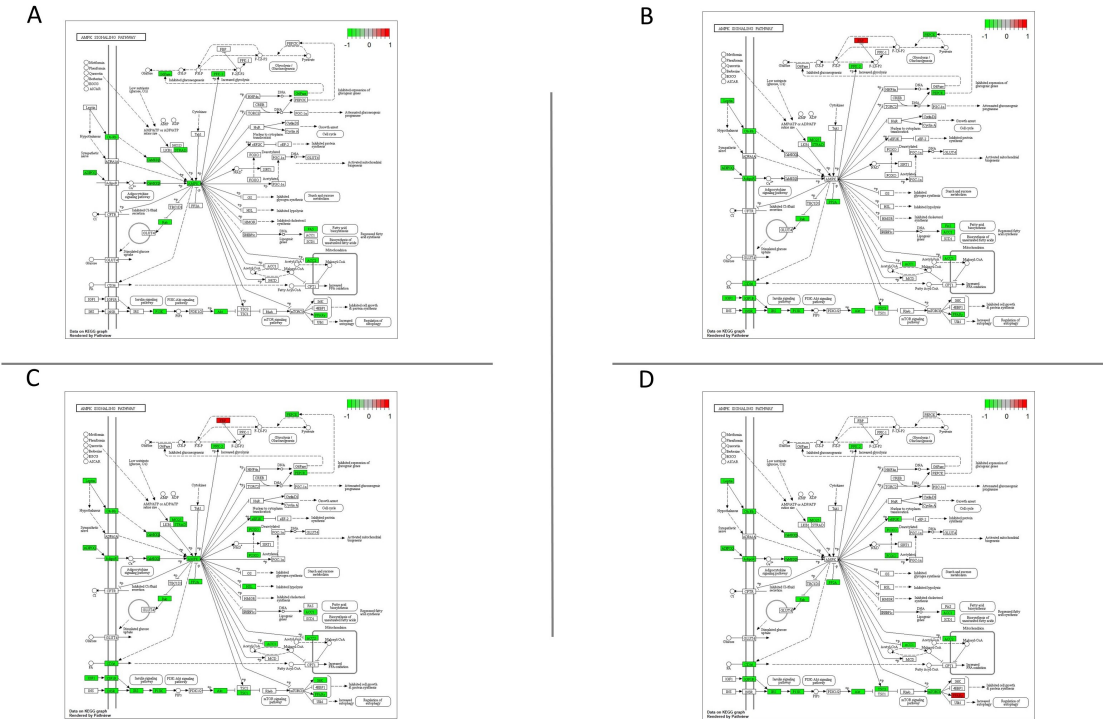

Supplement: bjophthalmol-2020-318330supp004_data_supplement.pdf [file bjophthalmol-2020-318330supp004_data_supplement.pdf]

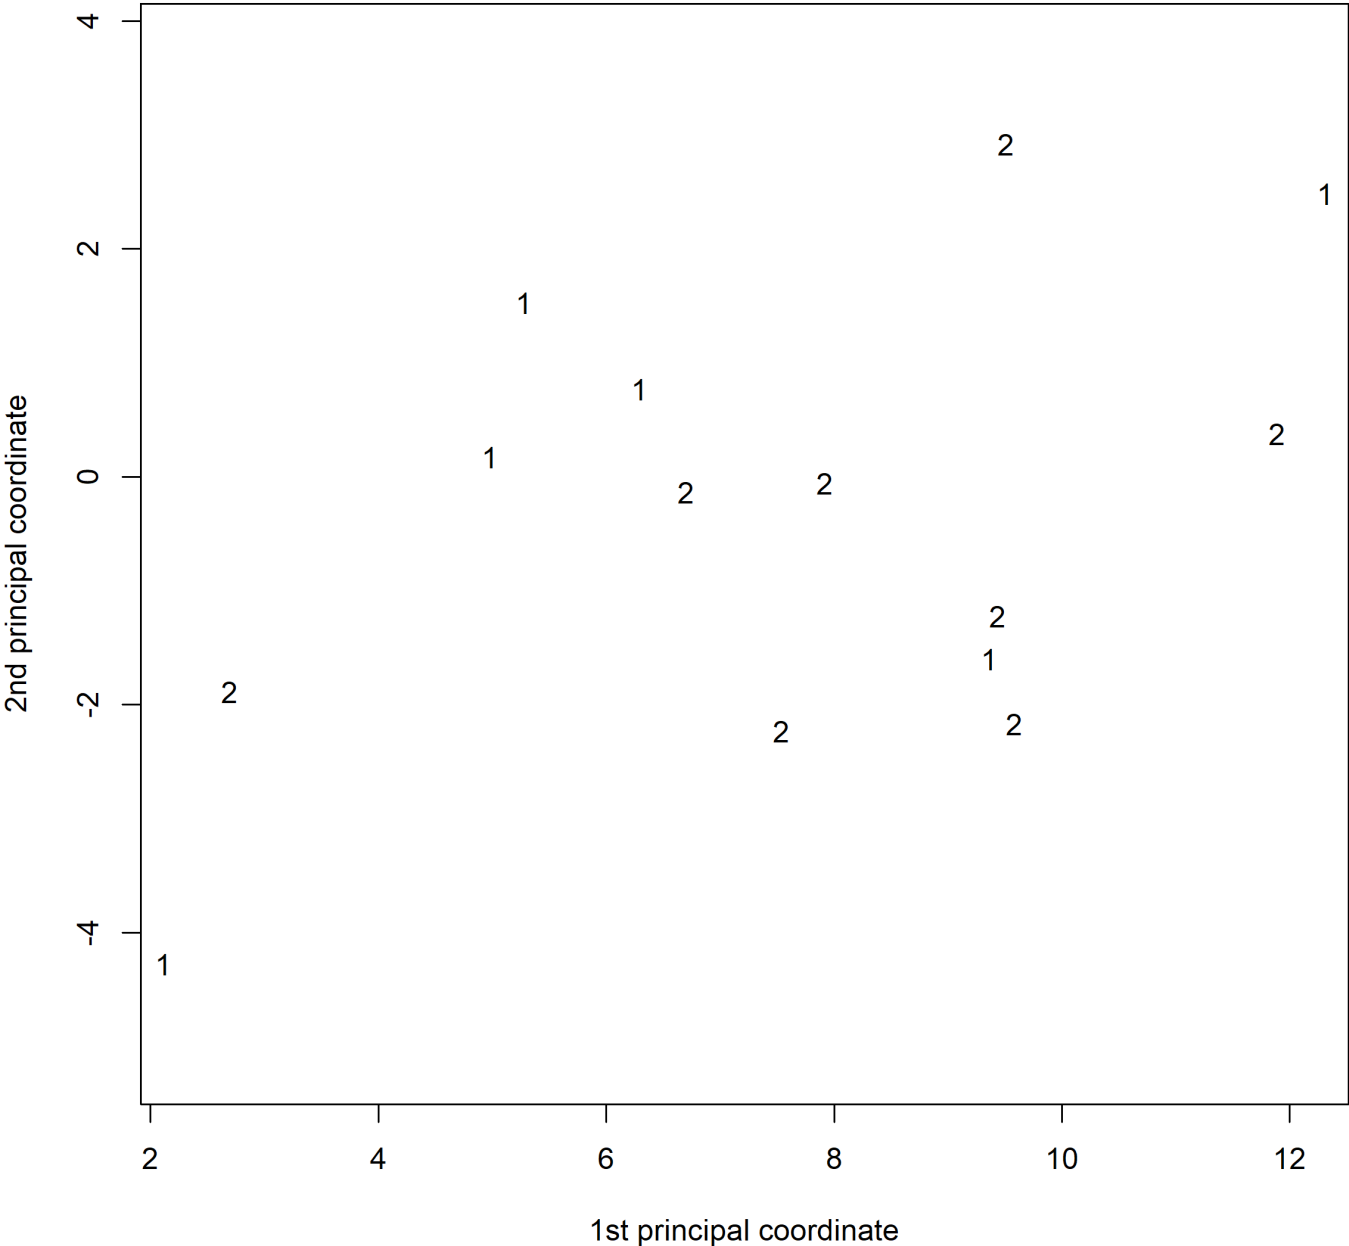

Supplement: bjophthalmol-2020-318330supp005_data_supplement.pdf [file bjophthalmol-2020-318330supp005_data_supplement.pdf]
